# Supplementary material for: Antiparasitic Activity of Hippeastrum Species and Synergistic Interaction between Montanine and Benznidazole against Trypanosoma cruzi
Source: MDPI journal article supplement (doi:10.3390/microorganisms11010144), 2023-01-06
Supplement: s1 [file s1]

Supplementary material

# Antiparasitic Activity of *Hippeastrum* Species and Synergistic Interaction between Montanine and Benznidazole against *Trypanosoma cruzi*

Mauricio Piñeiro <sup>1,2,†</sup>, Javier E. Ortiz <sup>1,2,†</sup>, Renata M. Spina Zapata <sup>3</sup>, Patricia A. Barrera <sup>3</sup>, Miguel A. Sosa <sup>3</sup>, Germán Roitman <sup>4</sup>, Jaume Bastida <sup>5</sup> and Gabriela E. Feresin <sup>1,2,\*</sup>

<sup>1</sup> Instituto de Biotecnología, Facultad de Ingeniería, Universidad Nacional de San Juan, Av. Libertador General San Martín 1109 O, San Juan CP 5400, Argentina

<sup>2</sup> Consejo Nacional de Investigaciones Científicas y Técnicas (CONICET), Ciudad Autónoma de Buenos Aires (CABA), Godoy Cruz CP 2290, Argentina

<sup>3</sup> Facultad de Ciencias Médicas, Instituto de Histología y Embriología “Dr. Mario H. Burgos”, Universidad Nacional de Cuyo-CONICET, Mendoza CP 5500, Argentina

<sup>4</sup> Facultad de Turismo y Urbanismo, Universidad Nacional de San Luis, Av. del Libertador San Martín 721 Villa de Merlo, San Luis CP D5881DFN, Argentina

<sup>5</sup> Departament de Biologia, Sanitat i Medi Ambient, Facultat de Farmàcia i Ciències de l’Alimentació, Universitat de Barcelona, 08028 Barcelona, Spain

\* Correspondence: gferesin@unsj.edu.ar

† These authors contributed equally to this work.

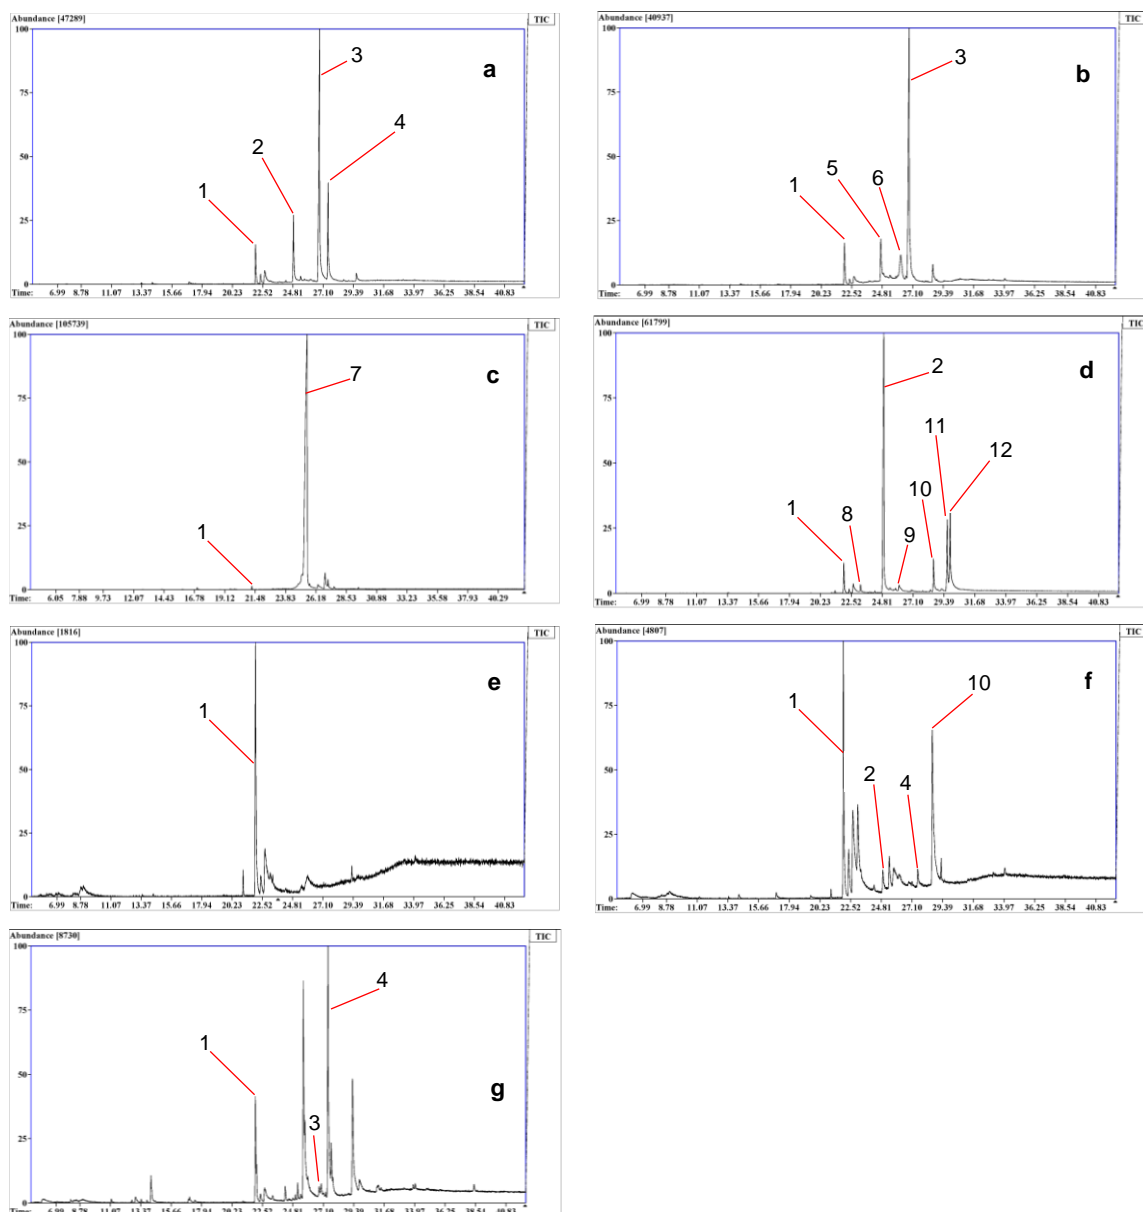

**Figure S1.** GC-MS chromatograms of *Hippeastrum* BAREs

a: *H. aglaiae*; b: *H. aulicum*; c: *H. glaucescens*; d: *H. hybrid*; e: *H. petiolatum*; f: *H. puniceum*; g: *H. reticulatum*.

The signals related to the identified alkaloids are indicated on each chromatogram: (1) codeine, (2) montanine, (3) lycorine, (4) 8-*O*-demethylhomolycorine, (5) 11,12-dehydroanhydrolycorine, (6) hamayne, (7) tazettine, (8) 4-*O*-methylnangustine, (9) pancracine, (10) hippeastrine, (11) 2-OH-homolycorine, (12) 7-OH-clivonine. The alkaloids galantamine and norlycoramine were detected in low amounts in *H. hybrid* and *H. aglaiae*, respectively.

|        |                       | Drug A  |                       |                      |           |                    |                    |
|--------|-----------------------|---------|-----------------------|----------------------|-----------|--------------------|--------------------|
| Drug B |                       | 0       | $0.25 \times IC_{50}$ | $0.5 \times IC_{50}$ | $IC_{50}$ | $2 \times IC_{50}$ | $4 \times IC_{50}$ |
|        | 0                     | Control | a                     | b                    | c         | d                  | e                  |
|        | $0.25 \times IC_{50}$ | A       | A + a                 |                      |           |                    |                    |
|        | $0.5 \times IC_{50}$  | B       |                       | B + b                |           |                    |                    |
|        | $IC_{50}$             | C       |                       |                      | C + c     |                    |                    |
|        | $2 \times IC_{50}$    | D       |                       |                      |           | D + d              |                    |
|        | $4 \times IC_{50}$    | E       |                       |                      |           |                    | E + e              |

Drug A alone

Drug B alone

Combination of Drug A + Drug B

| Drugs            | $IC_{50}$ ( $\mu\text{g/mL}$ ) |
|------------------|--------------------------------|
| Montanine        | 0.55                           |
| <i>H. hybrid</i> | 0.62                           |
| Bnz              | 2.14                           |

**Figure S2.** Representation of the design of the combination experiences.

*T. cruzi* epimastigotes were treated with Drug A and Drug B alone and in combination in a fixed ration for 48 h, in the concentrations of  $0.25 \times IC_{50}$ ,  $0.5 \times IC_{50}$ ,  $IC_{50}$ ,  $2 \times IC_{50}$ , and  $4 \times IC_{50}$ .

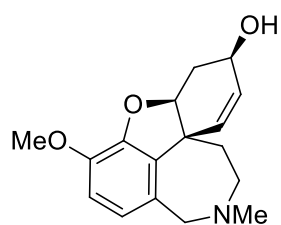

Galanthamine

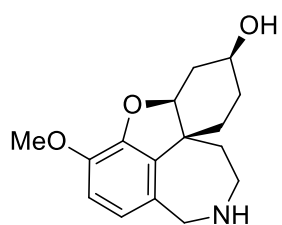

Norlycoramine

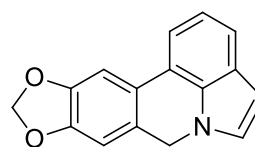

11,12-dehydroanhydrolycorine

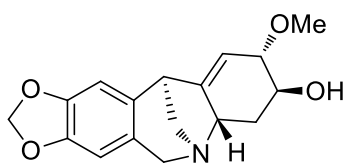

Montanine

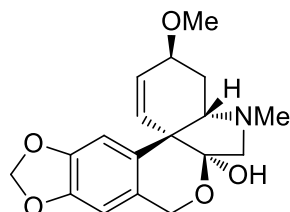

Tazettine

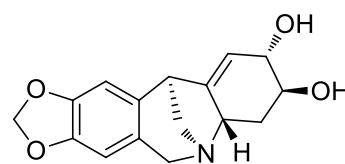

Pancracine

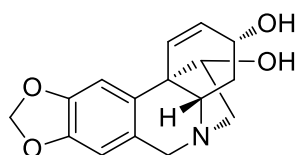

Hamayne

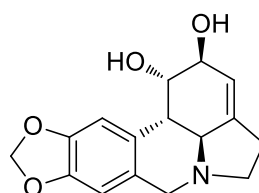

Lycorine

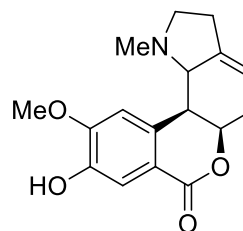

8-O-Demethylhomolycorine

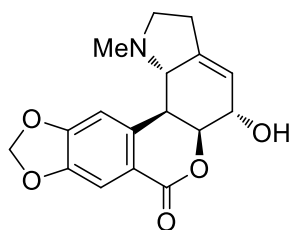

Hippeastrine

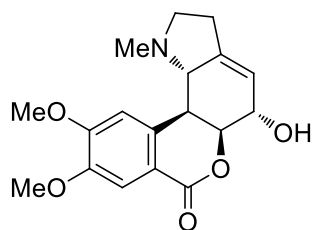

2-hydroxyhomolycorine

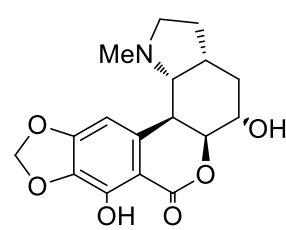

7-hydroxyclivonine

**Figure S3.** Alkaloids identified in *Hippeastrum* BAREs.

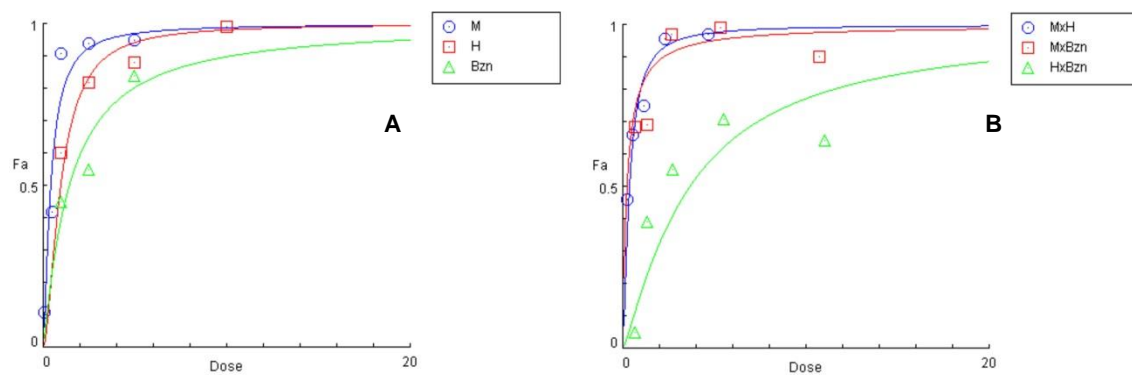

**Figure S4.** The dose-effect curves of single drugs (A) and drug combos (B).

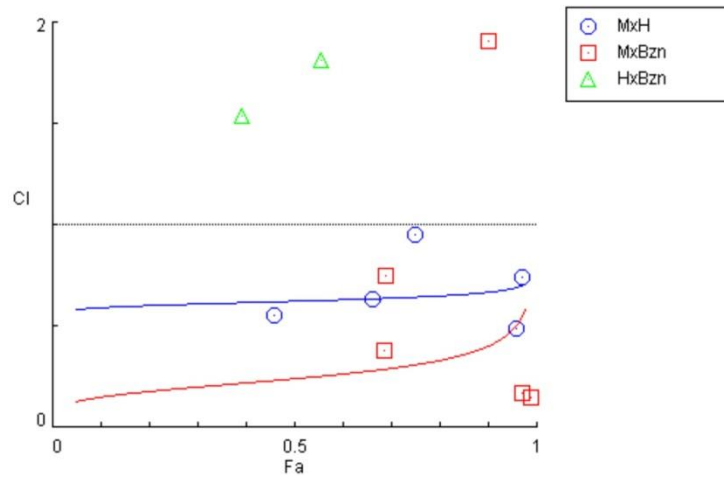

**Figure S5.** Chou-Talalay method Fa-CI plot of montanine, *H. hybrid* BARE, and Bzn.

CI was plotted on y-axis as a function of fractional effect (Fa) on the x-axis to assess drug synergism.  $CI < 1$ ,  $CI = 1$  and  $CI > 1$  indicate synergism, additivity, and antagonism, respectively.

**Table S1.** CI, DRI and Fa values of combinations of montanine, *H. hybrid* BARE and Bzn.

| Combination<br>(Drug A + Drug B)        |                         | Concentration<br>( $\mu\text{g}$ Drug A + $\mu\text{g}$ Drug B) | Fraction<br>Affected (Fa) | CI    | DRI      |           |
|-----------------------------------------|-------------------------|-----------------------------------------------------------------|---------------------------|-------|----------|-----------|
| Montanine<br>+<br><i>H. hybrid</i> BARE | 0.25 x IC <sub>50</sub> | 0.137 + 0.155                                                   | 0.460                     | 0.557 | M = 2.65 | H = 5.57  |
|                                         | 0.5 x IC <sub>50</sub>  | 0.275 + 0.309                                                   | 0.662                     | 0.635 | M = 2.40 | H = 4.55  |
|                                         | IC <sub>50</sub>        | 0.550 + 0.619                                                   | 0.750                     | 0.954 | M = 1.63 | H = 2.93  |
|                                         | 2 x IC <sub>50</sub>    | 1.100 + 1.239                                                   | 0.958                     | 0.493 | M = 3.47 | H = 4.87  |
|                                         | 4 x IC <sub>50</sub>    | 2.200 + 2.479                                                   | 0.972                     | 0.746 | M = 2.34 | H = 3.12  |
| Montanine<br>+<br>Bzn                   | 0.25 x IC <sub>50</sub> | 0.137 + 0.534                                                   | 0.685                     | 0.382 | M = 5.18 | B = 5.30  |
|                                         | 0.5 x IC <sub>50</sub>  | 0.275 + 1.069                                                   | 0.690                     | 0.749 | M = 2.63 | B = 2.70  |
|                                         | IC <sub>50</sub>        | 0.550 + 2.139                                                   | 0.972                     | 0.170 | M = 9.38 | B = 15.81 |
|                                         | 2 x IC <sub>50</sub>    | 1.100 + 4.279                                                   | 0.990                     | 0.150 | M = 9.93 | B = 20.19 |
|                                         | 4 x IC <sub>50</sub>    | 2.200 + 8.558                                                   | 0.903                     | 1.913 | M = 0.91 | B = 1.21  |
| <i>H. hybrid</i> BARE<br>+<br>Bzn       | 0.25 x IC <sub>50</sub> | 0.155 + 0.534                                                   | 0.050                     | 6.202 | H = 1.07 | B = 0.18  |
|                                         | 0.5 x IC <sub>50</sub>  | 0.309 + 1.069                                                   | 0.393                     | 1.538 | H = 2.36 | B = 0.89  |
|                                         | IC <sub>50</sub>        | 0.619 + 2.139                                                   | 0.555                     | 1.814 | H = 1.74 | B = 0.80  |
|                                         | 2 x IC <sub>50</sub>    | 1.239 + 4.279                                                   | 0.708                     | 2.142 | H = 1.29 | B = 0.73  |
|                                         | 4 x IC <sub>50</sub>    | 2.479 + 8.558                                                   | 0.643                     | 5.416 | H = 0.54 | B = 0.27  |

CI in red, indicate concentrations of drug pairs that are synergic.
